# Supplementary material for: Halovirus HF2 Intergenic Repeat Sequences Carry Promoters
Source: MDPI journal article supplement (doi:10.3390/v13122388), 2021-11-29
Supplement: s1 [file s1]

# Supplementary Figure S1.

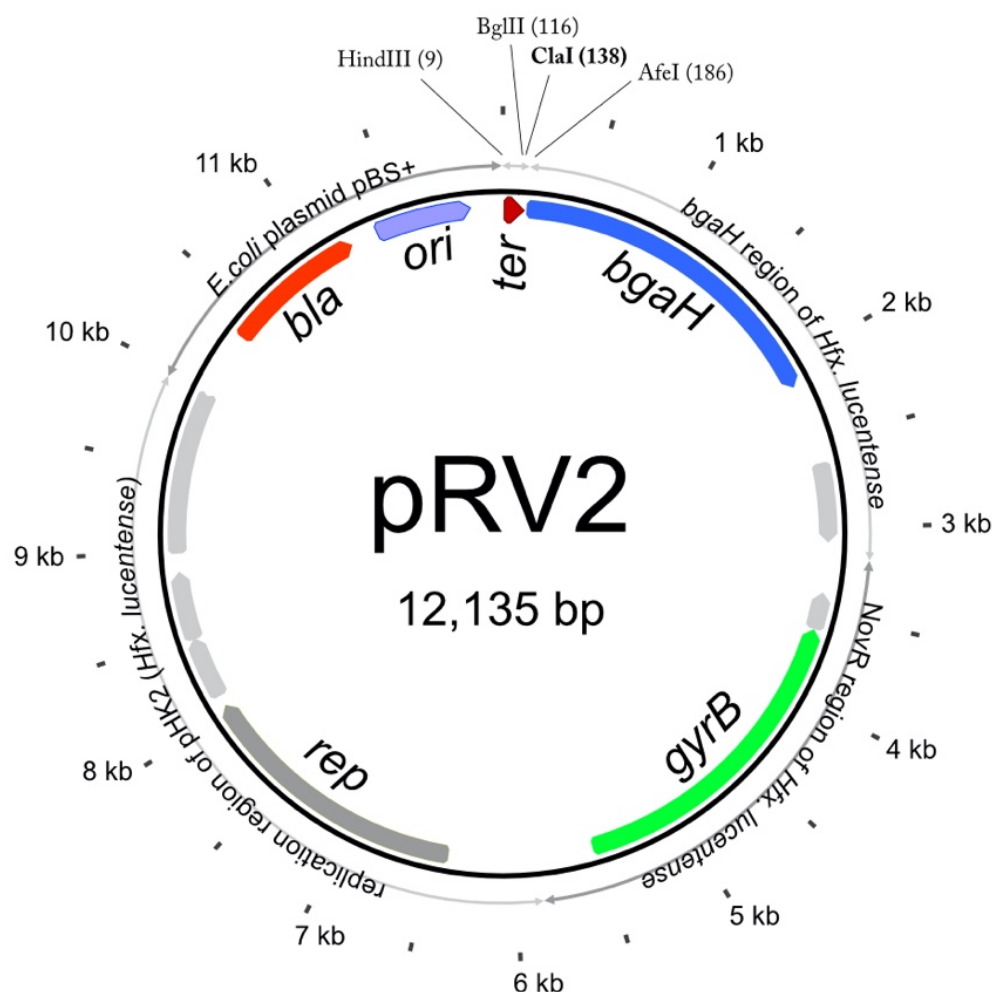

**Figure S1.** Map of reporter plasmid pRV2 (see Methods for construction details). The circular plasmid is 12,135 bp in length (accession MZ936313), and a scale is given around the outer perimeter (in kb). The next inner level shows the sources of sections of the plasmid, which are indicated by labelled, arrow-headed, grey arcs. Genes are depicted on the innermost level, and are represented as arrows with the most significant being labelled; *bla*, beta-lactamase; *ori*, *E.coli* replication origin; *ter*, L11e transcription termination sequence from *Hfx. volcanii*; *bgaH*, beta-galactosidase from *Hfx. lucentense*; *gyrB*, DNA gyraseB (NovR) from a *Hfx. lucentense* novobiocin resistant mutant; and *rep*, replicase from plasmid pHK2 of *Hfx. lucentense*. The *ClaI* site at the start codon of *bgaH* is used for insertion of sequences to be tested for promoter activity.

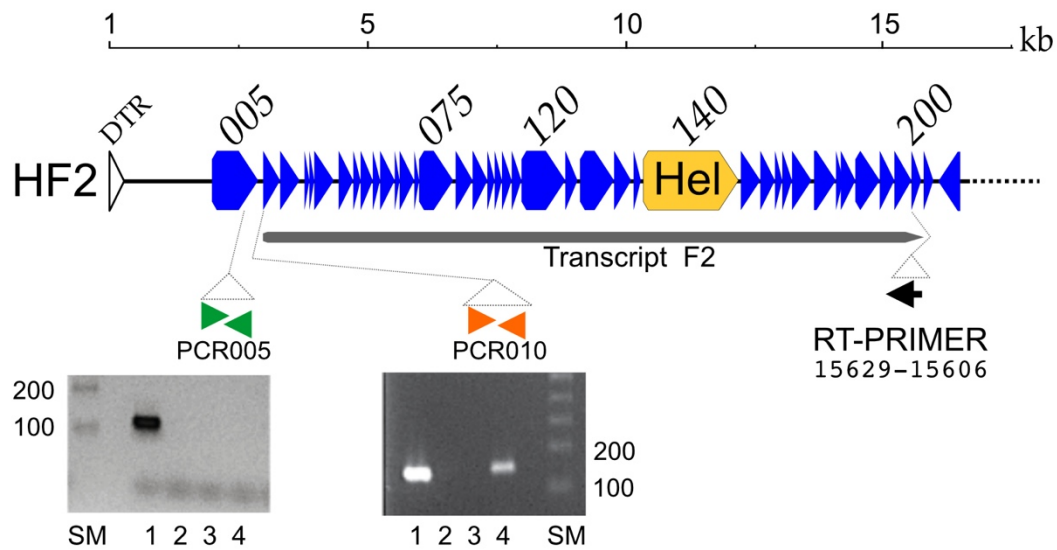

**Figure S2.** Example of RT-PCR results. At the top is a gene map of the left end of the HF2 genome with a scale bar (kb) above. DTR, direct terminal repeat. Numbers 005 - 200 refer to locus tag numbers of the CDS (blue arrows). Below this is a grey arrow representing transcript (F2) that spans HrrHF2\_005 to HrrHF2\_200 and was determined in the present study. A cDNA copy of this transcript was first synthesised using the primer 15629-15606 which is complementary to a sequence within the CDS of HrrHF2\_200. The length of this cDNA was then determined by PCRs targeting regions that progressively moved towards the 3' end of the cDNA. In this example, only the last two sets of PCR primers are presented (orange arrows for HrrHF2\_010 and green arrows for HrrHF2\_005), and the results of the PCRs using these primer pairs are shown directly below. PCR products were separated by agarose gel electrophoresis with lane loadings as follows: 1, positive control (HF2 DNA as template); 2, negative control (RNA template); 3, negative control (uninfected cell RNA, mock reverse transcribed), and 4, the cDNA preparation being tested. The same DNA size marker (SM; 1 kb ladder) was used for both gels, with the 100bp and 200bp bands indicated at the side. PCR010 was positive for the presence of cDNA, while PCR005 was negative. This method has previously been described for analysing the transcripts of halovirus SH1 [1].

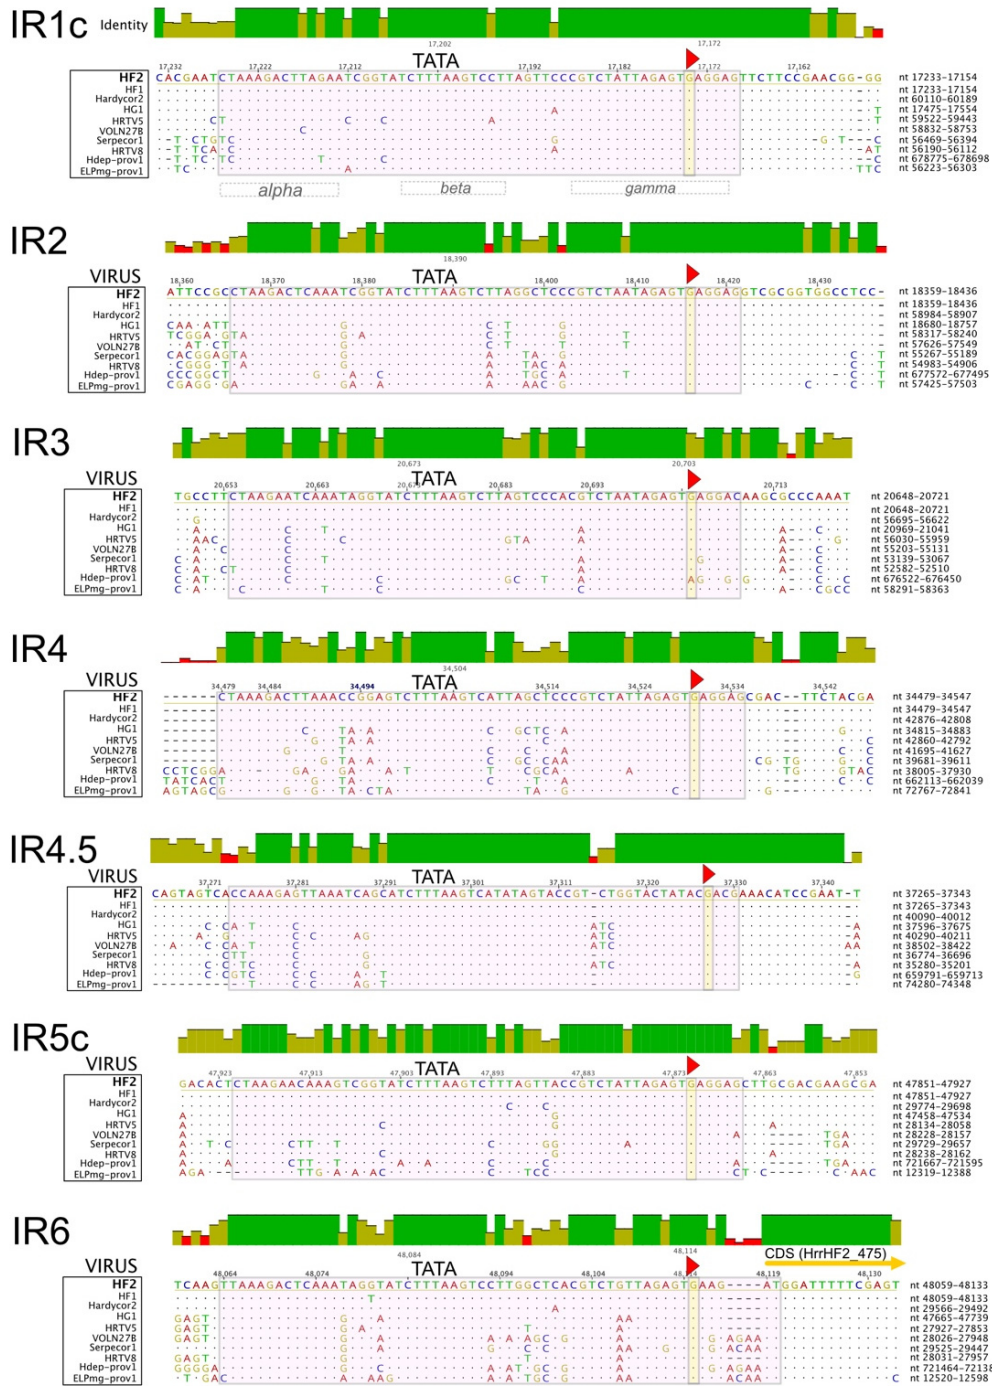

**Figure S3.** Conservation of class I Intergenic Repeat regions within members of Haloferacalesvirus

a. a The IR number of each alignment, and the virus genomes represented on each row of the alignment are shown at the left of each panel. HF2 is the reference sequence and identical bases in the alignment are indicated by dots. Conserved motifs (*alpha*, *beta* and *gamma*) of the IR are indicated under the first panel (IR1c). Pink shading indicates extent of the IR. The TATA box region is indicated above the HF2 sequence, as is the TSS (red triangular arrow). Above each panel is a graph of base similarity, with dark green indicating complete identity and red indicating the weakest similarity. Base coordinates are given at the right side of each alignment and correspond to the GenBank accessions for each virus genome, as shown in Figure 5 of the main text. For the two proviruses, the base coordinates are for the contigs or scaffolds that they are found on; contig NZ\_VCNM0100001.1 for Hdep-prov1, and scaffold JGI12451J12833\_1000001 for ELPmg-prov1 (available from the JGI IMG/M website at <https://img.jgi.doe.gov>).

## IR11c

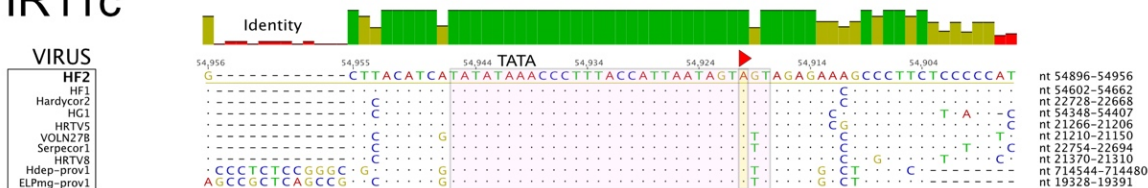

## IR12c

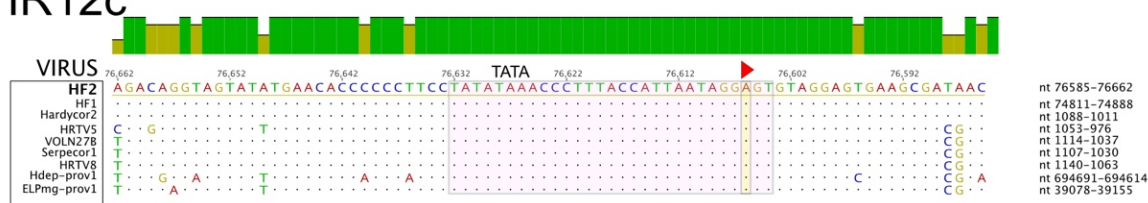

**Figure S4.** Conservation of class II Intergenic Repeat regions within members of *Haloferacalesvirus*<sup>a</sup>.  
See legend for Figure S3.

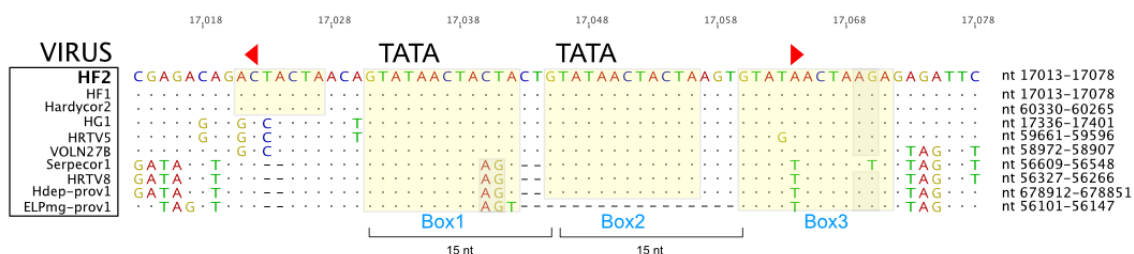

**Figure S5.** Conservation of T-17064 and T-17022 promoter region within members of *Haloferacalesvirus*<sup>a</sup>.  
<sup>a</sup>. See legend to Figure S3. Repeat sequences are shaded yellow and labeled Box1 to Box3.

**Table S1. Primers used to amplify IRs for ligation to the reporter vector pRV2.**

| Primer          | Sequence (5'-3') <sup>a</sup>      | HF2<br>Coordinates <sup>b</sup> |
|-----------------|------------------------------------|---------------------------------|
| IRA BSTF        | GCGGCGTTCGAAGCAAAGACTCATCTG        | 2880-2894                       |
| IRA BSTR        | GCGGCGTTCGAAGGGGAGTCGAACCC         | 2937-2924                       |
| IRB BSTF        | GCGGCGTTCGAAGTAAAGACTTAATAC        | 3666-3681                       |
| IRB BSTR        | GCGGCGTTCGAACCTCACTCTAAGAG         | 3706-3693                       |
| IRCc BSTF       | GCGGCGTTCGAACATAAGACTTAGAACG       | 4343-4358                       |
| IRCc BSTR       | GCGGCGTTCGAACCACTCGGAGCAAAG        | 4385-4371                       |
| IRDc BSTF       | GCGGCGTTCGAAGGATGGCGGCGCGG         | 7941-7954                       |
| IRDc BSTR       | GCGGCGTTCGAAAGTTGGAACGCTCAT        | 8001-7986                       |
| IRE BSTF        | GCGGCGTTCGAAGTATAACTACTACTG        | 17030-17045                     |
| IRE BSTR        | GCGGCGTTCGAAAGTTATACACTTAG         | 17067-17054                     |
| IRFc BSTF       | GCGGCGTTCGAACATAAGACTTAGAATC       | 17226-17211                     |
| IRFc BSTR       | GCGGCGTTCGAACCTCACTCTAATAG         | 17171-17184                     |
| IRG BSTF        | GCGGCGTTCGAACATAAGACTCAAATC        | 18366-18379                     |
| IRG BSTR        | GCGGCGTTCGAACCTCACTCTATTAGACGG     | 18421-18402                     |
| IRH BSTF        | GCGGCGTTCGAACATAAGAATCAAATAG       | 20654-20668                     |
| IRH BSTR        | GCGGCGTTCGAACCTCACTCTATTAGACGTGG   | 20707-20688                     |
| IRI BSTF        | GCGGCGTTCGAAGCGTTCTGCTAAAGAC       | 34471-34486                     |
| IRI BSTR        | GCGGCGTTCGAACCTCACTCTAATAGAC       | 34533-34518                     |
| IR4J BSTF       | GCGGCGTTCGAACCAAAGAGTTAAATC        | 37273-37288                     |
| IR4J BSTR       | GCGGCGTTCGAACGTCGTATAGTACCAG       | 37330-37315                     |
| IRKc BSTF       | GCGGCGTTCGAAGTGGTAAACTCAAAGTAGG    | 37444-37420                     |
| IRKc BSTR       | GCGGCGTTCGAAAACGCGGGCGAAATATC      | 37361-37377                     |
| IRL BSTF        | GCGGCGTTCGAACCTATTTATAAATAA        | 40953-40967                     |
| IRL BSTR        | GCGGCGTTCGAAGTCCACAGACGGCATAACGG   | 41001-40983                     |
| IRMc BSTF       | GCGGCGTTCGAACCTCACTCTAATAG         | 47866-47881                     |
| IRMc BSTR       | GCGGCGTTCGAACATAAGAACAAAGTCG       | 47921-47907                     |
| IRN BSTF        | GCGGCGTTCGAATTAAAGACTCAAATAGG      | 48064-48080                     |
| IRN BSTR        | GCGGCGTTCGAACCTCACTCTAACAG         | 48118-48105                     |
| IRPc BSTF       | GCGGCGTTCGAACATAAGACTTAATC         | 69431-69418                     |
| IRPc BSTR       | GCGGCGTTCGAAGGTTAACCATAAAG         | 69390-69403                     |
|                 | CGAATATATAAACCCCTTTACCATTAATAGTAGT |                                 |
| CL2 IROCII BSTF | <b>TT</b>                          | 54946-54917                     |
|                 | CGAAACTACTATTAATGGTAAAGGGTTTATATA  |                                 |
| CL2 IROCII BSTR | <b>TT</b>                          | 54917-54946                     |
|                 | CGAATATATAAACCCCTTTACCATTAATAGGAGT |                                 |
| CL2 IRQCII BSTF | <b>TT</b>                          | 76630-76602                     |
|                 | CGAAACTCCTATTAATGGTAAAGGGTTTATATA  |                                 |
| CL2 IRQCII BSTR | <b>TT</b>                          | 76602-76630                     |

<sup>a</sup>Engineered *Bst*B1 tags are underlined. Class 2 IRs were synthesised as linkers with *Bst*B1 overhangs (shown in bold). <sup>b</sup>numbering according to accession AF222060.2.

**Table S2. HF2 oligonucleotide primers used for RT-PCR or primer extension reactions.**

| Primer <sup>a</sup> | Sequence (5'-3')             |
|---------------------|------------------------------|
| 1712-1727           | GCGGCGTTCGAAGGCCTAAAGGGATGTG |
| 1855-1868           | GCGGCGTTCGAAGCTCGCTAAGCAAAC  |
| 1926-1913           | ATAGCGTTCGAAACCAACCCCCCAT    |
| 2028-2015           | ATGGCGTTCGAACCGATGGTGTTCAC   |
| 2098-2077           | GTGAGCTAAGCTCACGGTGGAG       |
| 2880-2894           | GCGGCGTTCGAAGCAAAGACTCATCTG  |
| 2937-2924           | GCGGCGTTCGAAGGGGAGTCGAACCC   |
| 3072-3051           | GCCTCTGGTCGATTTTGAGGTC       |
| 3073-3093           | ATCGAGCCTTCGGAGCGATAG        |
| 3220-3201           | CCTTCGTATTCCTCCGGCTC         |
| 3666-3681           | GCGGCGTTCGAAGTAAAGACTTAATAC  |
| 3706-3693           | GCGGCGTTCGAACCTCACTCTAAGAG   |
| 3758-3780           | ATGTGCCACTTCAACGACGACTG      |
| 3837-3817           | GAAGCTCCTCCTACGTGGGTC        |
| 3881-3860           | GGCAGTCTGAGTATCCGCAAGC       |
| 4018-4001           | GTCTCGTAGCTCGGTATG           |
| 4220-4241           | GACAGTAACCGACGCCGACTAC       |
| 4343-4358           | GCGGCGTTCGAAGTAAAGACTTAGAACG |
| 4385-4371           | GCGGCGTTCGAACCACTCGGAGCAAAG  |
| 4509-4532           | TTGAAGGTCGGAGATTACCTCCAC     |
| 4606-4585           | GTCGGCTCAATCGCAATCGAAC       |
| 6436-6418           | GTTGTGGATTCCCTCTCCG          |
| 6692-6706           | GCGGCGATCGATATGAGTGTTAACACC  |
| 6846-6871           | TCGAGGGATACAACCACGACGACTAC   |
| 6956-6930           | GGACTGTCATATAGCTACCAGCGAGTC  |
| 7134-7156           | CAAGCCGAACAAGCTTCCGTTGG      |
| 7258-7234           | GAGTCGTGGACTCGATAACTACCTC    |
| 7818-7839           | GTCACCACGGACGAGAAGTAGC       |
| 7941-7954           | GCGGCGTTCGAAGGATGGCGGCGCGG   |
| 7995-8018           | CCAACCTCAATCGAGACGACTGCC     |
| 8001-7986           | GCGGCGTTCGAAAGTTGGAACGCTCAT  |
| 8119-8102           | GTCAACTGACCGGCCTTC           |
| 8249-8225           | GTAAATCGTCGGGTCGTCTTCGTTG    |
| 10081-10101         | GGAGTTCGGTTCTGGTTCCAG        |
| 10386-10408         | CATAGCGTCCAGACTGTTGAACC      |
| 10471-10451         | TCGTCAGCGAGGTGAAACAGG        |
| 13210-13225         | ATAGCGATCGATATGAGTACGCTCGCTG |
| 15568-15589         | GTTCCGAGCTGTCACAATCACC       |
| 15629-15606         | CCATCTTCTGAAGCATGAACACGG     |
| 16210-16233         | ATCGAGCCACGGAGCTTCAACGAC     |
| 16496-16509         | GCGGCGTTCGAAGTAAACTCGCTCAT   |

|             |                                     |
|-------------|-------------------------------------|
| 16530-16507 | CATCGACCACCGGAGGTCGGAATG            |
| 16542-16521 | CATCATTCTCACCATCGACCAC              |
| 16580-16567 | ATAGCGTTCGAAGCTGACAACCTCGG          |
| 16892-16911 | GCGTGCTGTTCTCTCGTTC                 |
| 17030-17045 | GCGGCGTTCGAAGTATAACTACTACTG         |
| 17067-17054 | GCGGCGTTCGAAAGTTATACACTTAG          |
| 17171-17184 | GCGGCGTTCGAACCTCACTCTAATAG          |
| 17211-17186 | GCGGTATCTTTAAGTCCTTAGTTCCCG         |
| 17217-17233 | GCGGCGTTCGAAAAGTCTTTAGATTCTG        |
| 17226-17211 | GCGGCGTTCGAACTAAAGACTTAGAATC        |
| 17291-17278 | GCGGCGTTCGAATCGTCCTCTTTCAT          |
| 17647-17667 | TTCTACGAGATGGTGGAGCTG               |
| 18366-18379 | GCGGCGTTCGAACTAAGACTCAAATC          |
| 18371-18385 | GCGGCGTTCGAACTCAAATCGGTATC          |
| 18421-18402 | GCGGCGTTCGAACTCCTCACTCTATTAGACGG    |
| 18511-18498 | ATAGCGTTCGAACCCAAAAACCACCG          |
| 18511-18528 | GGACGTAGCTCAGCTCGG                  |
| 18531-18551 | AGAGCGTTCGGCTTCTAACCG               |
| 18550-18532 | GGTTAGAAGCCGAACGCTC                 |
| 19584-19601 | AAGCGACAGGCTGAGCTG                  |
| 19598-19580 | CTCAGCCTGTCGCTTGAAG                 |
| 19626-19640 | GCGGCGTTCGAATGAAGAACGAGTAG          |
| 19713-19700 | GCGGCGTTCGAATTGACCCTACCCAC          |
| 20101-20118 | CTTCGACCTGCTCGATGC                  |
| 20292-20274 | CCGTTGGTTCATCGAAGG                  |
| 20503-20481 | CAGCGAGAGAAGTGAGAGAGTCC             |
| 20649-20662 | GCGGCGTTCGAAGCCTTCTAAGAATC          |
| 20654-20668 | GCGGCGTTCGAACTAAGAATCAAATAG         |
| 20707-20688 | GCGGCGTTCGAACCTCACTCTATTAGACGTGG    |
| 20738-20725 | GCGGCGTTCGAAGGCAAGAGAAAGAG          |
| 20748-20765 | CAGTTGGTAGAGCGCCTG                  |
| 20751-20769 | GCGGCGTTCGAATTGGTAGAGCGCCTGACTG     |
| 20783-20761 | GACTACCTGATTAACAGTCAGGC             |
| 20827-20805 | GCGGCGTTCGAAATTAAGGGAAGATACCCGACGCC |
| 20828-20850 | CTGGACGTGTTCAAGGAGAACAG             |
| 20885-20865 | GAATCGAACCGCCCTACACTC               |
| 20930-20911 | GCGGCGTTCGAAAGCTACGGCATAGGTATTG     |
| 21008-20990 | GCTGTTGTAGTCGGTGTCTG                |
| 21080-21103 | CGCCTTCATCTCGTTCAAGATTGG            |
| 21225-21206 | CCGTATCATCCGACTCGTCG                |
| 22025-22042 | GAGGTACAGGTCGGTTCG                  |
| 22088-22110 | ACGTTCTGACCGCTGAGATTCC              |
| 22185-22165 | GATTCCACGCAAGTTCTTCC                |

|             |                                  |
|-------------|----------------------------------|
| 22237-22216 | GTCCGACTTTCGGACGTGCTTC           |
| 22261-22275 | GCGGCGTTCTGAAGATGAAGTAGTATAG     |
| 22330-22356 | CCCGTTCTCAACCAGATGGAAGATACC      |
| 22335-22321 | GCGGCGTTCTGAAACGGGTATGTTTCAT     |
| 22348-22331 | CCATCTGGTTGAGAACGG               |
| 22455-22431 | GTTGAACCACGAGAGGAACACGGTC        |
| 23950-23977 | AGGATACAAGAGCCGGTGAACAATCGAG     |
| 24115-24091 | CGTCGAAGTCGATGAAGATAGTGTC        |
| 25089-25103 | GCGGCGATCGATATGAGTTACCAACAG      |
| 26281-26295 | ATAGCGTTCTGAAGATAGCTCCGACTC      |
| 26359-26374 | GCGGCGATCGATATGGAAAACAAAGACG     |
| 26372-26359 | GCGGCGTTCTGAATCTTTGTTTCCAT       |
| 26784-26799 | GCGGCGATCGATATGGAAGTTACAGAAC     |
| 27153-27169 | GCGGCGATCGATATGATGAGTTTTGGAAC    |
| 27539-27525 | CGGGATCCTTCTATTCCTTCGTCC         |
| 30481-30502 | GAACAGCCGAAGTACGCTGTTG           |
| 30593-30571 | GGAACCACGATAACAACGTCAGC          |
| 31421-31441 | TCGGAGAGGATAGCAACCGAG            |
| 31542-31521 | GAGAATATCCGCTGAGATTGCG           |
| 34644-34662 | ACGAGAGGATTGCCGCATC              |
| 36920-36933 | ATAGCGTTCTGAAGGAGGTCTACGAGG      |
| 37071-37058 | GCGGCGTTCTGAATTCGCTGTCTTCAT      |
| 37149-37168 | GGACGTTGGTGGTTTCGCTG             |
| 37248-37272 | GACTGTTGGAGCCACCTCAGTAGTC        |
| 37273-37288 | GCGGCGTTCTGAACCAAAGAGTTAAATC     |
| 37330-37315 | GCGGCGTTCTGAACGTCGTATAGTACCAG    |
| 37361-37377 | GCGGCGTTCTGAAAACGCGGGCGAAATATC   |
| 37444-37420 | GCGGCGTTCTGAAGTGGTAAACTCAAAGTAGG |
| 37578-37558 | GGTCTTCCACTTCTTCTTCTGG           |
| 38589-38607 | CCCGATGAACATGGAAGAC              |
| 38759-38736 | GCAGAGTACGTTCCGTTGTCGTAC         |
| 39063-39045 | CCAGTCTCCTCGATGAATC              |
| 39093-39112 | TCACAATCGAGGCCGACTCC             |
| 39381-39403 | GTCGGAAGAAGGAGTATCGCCTG          |
| 39471-39490 | GTGTCTGAGTCTGAGTGAG              |
| 40842-40860 | GGTCTCGTCCTTACCAAGG              |
| 40931-40945 | GCGGCGTTCTGAACCTCTGTACCAGCTAC    |
| 40953-40967 | GCGGCGTTCTGAACCTATTTATAAATAA     |
| 41001-40983 | GCGGCGTTCTGAAGTCCACAGACGGCATAACG |
| 41003-40985 | GTGTCCACAGACGGCATAAC             |
| 41034-41021 | GCGGCGTTCTGAATCATTTCCCCACAT      |
| 41105-41125 | CACCTCGCCTTCCTCGAACAC            |
| 41146-41117 | GTCCTTGATTTGTTCCATCTCGTGTTTCGAG  |



|             |                                      |
|-------------|--------------------------------------|
| 41200-41177 | CATGCCGAAGATTTCTGCGGCGAG             |
| 41234-41253 | CAACACAACGGCGACGTTTC                 |
| 41327-41341 | GCGGCGTTCGAAGTCCCATATACAACC          |
| 41385-41372 | GCGGCGTTCGAAGACGTATCTACCAT           |
| 41426-41409 | CGAGTCGGGATGCTATCC                   |
| 47142-47160 | CACCTGATTACACGTCTCG                  |
| 47671-47686 | GCGGCGTTCGAAGTGACTACGGACATTG         |
| 47681-47662 | TCCGTAGTCACAACCTGAAAC                |
| 47866-47881 | GCGGCGTTCGAACTCCTCACTCTAATAG         |
| 47921-47907 | GCGGCGTTCGAACTAAGAACAAAGTCG          |
| 47938-47923 | GCGGCGTTCGAACAGACGACTGACAC           |
| 47943-47964 | GGAATCGGTCGAGTATCTGCTG               |
| 48049-48063 | GCGGCGTTCGAACATATCAGTTTCAAG          |
| 48064-48080 | GCGGCGTTCGAATTAAAGACTCAAATAGG        |
| 48118-48105 | GCGGCGTTCGAACTTCACTCTAACAG           |
| 48132-48150 | GTGTAACCAACGCCGTTAG                  |
| 48133-48119 | GCGGCGTTCGAACTCGAAAAATCCAT           |
| 48167-48145 | CCTTGTTAGAGAGGTCACTAACG              |
| 48457-48437 | CGCATCGAAGTAACTTCACC                 |
| 49107-49089 | CGCGCATCTCCGTGCTAAG                  |
| 49920-49933 | GCGGCGTTCGAATTTACTCGTGCCAT           |
| 49984-50003 | GTTTCCGGGTCTGACGTTTC                 |
| 50002-49989 | GCGGCGTTCGAAAAACGTCAGACCCG           |
| 50046-50022 | GGTGATATTCCGGCATCTTACGAGG            |
| 50259-50239 | GGGAATGGCAACAGCAACTCC                |
| 52401-52422 | GGGATTAGCTCCCTGAACGTAC               |
| 52540-52520 | TCGAGGATGTTTACGACCTCG                |
| 53290-53309 | CTAACCAGTTGCTCTACCTC                 |
| 54785-54809 | GAATAACGACCGCCTGCTCGAACTC            |
| 54836-54817 | GACCTTGCTTCAGTAAGTGG                 |
| 54917-54946 | CGAAACTACTATTAATGGTAAAGGGTTTATATATT  |
| 54946-54917 | CGAATATATAAACCCCTTTACCATTAATAGTAGTTT |
| 55081-55055 | GAATCCGTCTATCACGGTGAATGGTAG          |
| 69390-69403 | GCGGCGTTCGAAGGTAAACCATAAAG           |
| 69431-69418 | GCGGCGTTCGAACTAAAGACTTAATC           |
| 70170-70150 | CTATCTCGCGGAAGCGTGAGC                |
| 70230-70211 | AGCTGACCGAGGAGCTTTCC                 |
| 74411-74430 | CGCATCGCCGTAGAAGTAGG                 |
| 74451-74470 | GCGGCGTTCGAATACGGTCGAAAGAGCGTCAG     |
| 74640-74658 | GGAGTCGAACCGGCGTAAG                  |
| 74660-74641 | GCGGCGTTCGAACTCTTACGCCGGTTCGACTC     |
| 74699-74673 | GAGACAGTAGTGTAGTGGTATCATCGG          |
| 74730-74710 | GCGGCGTTCGAATACGTCAGTTTGGCCGATATG    |

|             |                                      |
|-------------|--------------------------------------|
| 74881-74899 | AGAGACTTCAACCGGCTCG                  |
| 75638-75660 | TTTCATCGTCGGGGTCGAAGCTC              |
| 75650-75627 | CCCGACGATGAAATATTCGATGAC             |
| 75722-75704 | GAACAGCTCGCCGCAGTTG                  |
| 76444-76467 | GGTGTTAGAAAGAGTTGAACTCGG             |
| 76602-76630 | CGAAACTCCTATTAATGGTAAAGGGTTTATATATT  |
| 76630-76602 | CGAATATATAAACCCCTTTACCATTAATAGGAGTTT |
| 76755-76773 | GCGGCGTTCTGAAGATAGGCCGATAAGTC        |
| 76765-76743 | GGCCTATCTTCTTCTTATGGTGC              |
| 76816-76803 | GCGGCGTTCTGAAACCGGGTCTACCAT          |
| 77121-77143 | TACGAGAGAGGTCAGATGAGGAC              |
| 77241-77220 | GGTCTGGTTCATCTGGTGTGTG               |
| 77380-77356 | GCACACGCGCTTTAGTAAGTCCACC            |

<sup>a</sup>primers are designated by their positions on the HF2 genome (AF222060.2).

**Table S3.** Oligonucleotide primer used for primer extension on transcripts generated by reporter vector pRV2

| Primer    | Sequence (5'-3')         | Target               |
|-----------|--------------------------|----------------------|
| Bgal pEXT | GCCATCTGACTGATATCGGTCTCC | 214-191 <sup>a</sup> |

<sup>a</sup>numbering according to pRV2 (accession MZ936313)

**Table S4.** HF2 infected cell transcripts detected by RT-PCR

| Transcript Name | 3' end primer | most 5' primer | Locus_tag range (HrrHF2_) <sup>a</sup> | Direction <sup>a</sup> | Estimated length of transcript (bp) <sup>b</sup> |
|-----------------|---------------|----------------|----------------------------------------|------------------------|--------------------------------------------------|
| F1              | 2937-2924     | 1855-1868      | 005                                    | +                      | 1,095                                            |
| F2              | 15629-15606   | 3073-3093      | 010-200                                | +                      | 12,743                                           |
| F44             | 20503-20481   | 17171-17184    | 220-255                                | +                      | 3,413                                            |
| F52             | 39063-39045   | 20751-20769    | 260-435                                | +                      | 18,701                                           |
| F92             | 77241-77220   | 41327-41341    | 460-660                                | +                      | 35,961                                           |
| R131            | 41327-41341   | 76630-76602    | 655-460                                | -                      | 35,320                                           |
| R90             | 39471-39490   | 41003-40985    | 450-440                                | -                      | 1,564                                            |
| R52             | 1855-1868     | 20707-20688    | 260-005                                | -                      | 18,865                                           |

<sup>a</sup>locus tag and direction are according to accession AF222060.2. <sup>b</sup>estimated from the 3' end of the gene in which the cDNA synthesis primer is situated to the 5' end of the gene in which the last productive PCR was detected.

**Table S4.** Transcript names are as shown in Figure 3 of the main text. The 3' and 5' primer coordinates and locus tags correspond to the HF2 genome sequence (accession AF222060.2).

### Supplementary text S1. *Haloferacalesvirus* isolate Hardygib1.

Hardygib1 was isolated in 1998 from Lake Hardy, Victoria (35° 04' S, 141° 44' E) by plating a water sample on lawns of *Haloferax gibbonsii* Ma2.38<sup>T</sup>. Methods of isolation, plaque purification, preparation of virus stock and its long-term storage, DNA extraction and sequencing were as described in [2,3]. The reads were assembled from the same dataset that was used to determine the sequence of the *Haloferax gibbonsii* provirus Halfgib1 [2]. The 73,193 bp Hardygib1 genome sequence is about 96% complete but is missing sequence at both termini. It is estimated to be missing about 1kb at the left end (relative to halovirus HF2, accession AF222060.2), which includes the left terminal direct repeat. At the right end, it is estimated to be missing about 2.5 kb, which includes the right terminal direct repeat, the four genes corresponding to HrrHF2\_645 to HrrHF2-660 as well as the N-terminal half of HrrHF2\_640. The sequence has been deposited at Genbank under the accession OK649958. Pairwise comparison of viruses available in Genbank (accessed August 2021) shows it to be most similar to HRTV5 (83% nucleotide identity), and its encoded glycine-rich adhesin (corresponding to HrrHF2\_490) corresponds to group 3 of [4].

### References

- Porter, K.; Russ, B.E.; Yang, J.; Dyal-Smith, M.L. The transcription programme of the protein-primed halovirus SH1. *Microbiology* **2008**, *154*, 3599-3608.

2. Dyall-Smith, M.; Pfeiffer, F.; Chiang, P.W.; Tang, S.L. The novel halovirus Hardycor1, and the presence of active (induced) proviruses in four haloarchaea. *Genes (Basel)* **2021**, *12*, 149.
3. Dyall-Smith, M.; Tang, S.L.; Russ, B.; Chiang, P.W.; Pfeiffer, F. Comparative genomics of two new HF1-like haloviruses. *Genes (Basel)* **2020**, *11*, 405.
4. Liu, Y.; Demina, T.A.; Roux, S.; Aiewsakun, P.; Kazlauskas, D.; Simmonds, P.; Prangishvili, D.; Oksanen, H.M.; Krupovic, M. Diversity, taxonomy, and evolution of archaeal viruses of the class *Caudoviricetes*. *PLoS Biol.* **2021**, *19*, e3001442.
